# Supplementary material for: Validity and Reliability of the Positive Aspects of Caregiving (PAC) Scale and Development of Its Shorter Version (S-PAC) Among Family Caregivers of Older Adults
Source: Oxford University Press journal article supplement (doi:10.1093/geront/gnw198), 2016-11-16
Supplement: gnw198_suppl_APPENDIX.docx [file gnw198_suppl_APPENDIX.docx]

**APPENDIX**

**Supplementary Figure 1. Factor models tested via Confirmatory Factor Analysis: 2-Factor Model (Panel A), 1-Factor Model (Panel B), Bi-factor Model, 9 items (Panel C), and Bi-factor Model, 7 items (Panel D)**

**
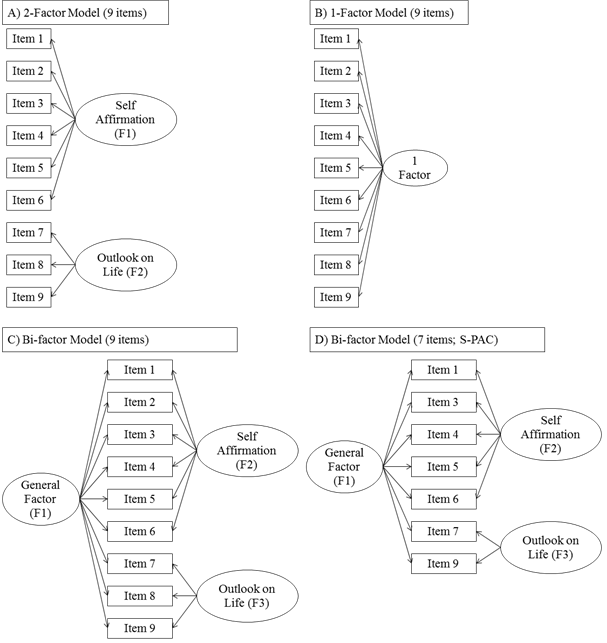
**

**Supplementary Table 1. Caregiver and care-recipient characteristics (N=1,132)**

|  | **Mean (SD) or Frequency (%)** |
| --- | --- |
| **Caregiver characteristics** |  |
| Age (in years; range: 20 to 95) | 55.4 (12.4) |
| Female | 678 (59.9%) |
| Ethnicity |  |
| Chinese | 710 (62.7%) |
| Malay | 325 (28.7%) |
| Indian | 88 (7.8%) |
| Others | 9 (0.8%) |
|  |  |
| **Care-recipient characteristics** |  |
| Age (in years; range: 75 to 104) | 83.4 (5.5) |
| Female | 779 (68.8%) |
| Ethnicity |  |
| Chinese | 710 (62.7%) |
| Malay | 327 (28.9%) |
| Indian | 88 (7.8%) |
| Others | 7 (0.6%) |
| ADL limitations |  |
| Number of limitations (range: 1 to 7) | 4.5 (2.3) |
| Limitation in walking | 1020 (90.1%) |
| Limitation in showering | 858 (75.8%) |
| Limitation in toileting | 770 (68.0%) |
| Limitation in transferring | 733 (64.8%) |
| Limitation in dressing | 695 (61.4%) |
| Limitation in grooming | 543 (48.0%) |
| Limitation in eating | 517 (45.7%) |
| IADL limitations |  |
| Number of limitations (range: 0 to 7) | 6.1 (1.3) |
| Limitation in using transportation | 1115 (98.5%) |
| Limitation in shopping | 1110 (98.1%) |
| Limitation in doing housework | 1109 (98.0%) |
| Limitation in cooking | 1053 (93.0%) |
| Limitation in taking medication | 886 (78.3%) |
| Limitation in financial management | 787 (69.5%) |
| Limitation in using telephone | 784 (69.3%) |

ADL: Activity of Daily Living; IADL: Instrumental Activity of Daily Living; SD: Standard deviation

**Supplementary Table 2: Correlation of score on the CES-D scale and CE subscale of the CRA with scores on the 9-item Positive Aspects of Caregiving (PAC) scale (*Panel A*) and the 7-item Short-PAC scale (*Panel B*)**

|  | **CES-D** | **CE subscale of the CRA** |
| --- | --- | --- |
| ***Panel A (9-item PAC scale)*** | | |
| SA Subscale | -0.13* | 0.27* |
| OL Subscale | -0.21* | 0.15* |
| Overall Scale | -0.17* | 0.25* |
| ***Panel B (7-item S-PAC scale)*** | | |
| SA Subscale | -0.13* | 0.27* |
| OL Subscale | -0.19* | 0.16* |
| Overall Scale | -0.16* | 0.25* |

CE: Caregiver esteem; CES-D: Center for Epidemiologic Studies-Depression Scale; CRA: Caregiver Reaction Assessment; PAC: Positive Aspects of Caregiving; OL: Outlook-on-life; SA: Self affirmation; S-PAC: Short-Positive Aspects of Caregiving

*p less-than 0.0001
